# Supplementary material for: Boosting electrocardiography leads location training through virtual reality simulation: effects on skill performance and learner satisfaction
Source: Research Square preprint supplement (doi:10.21203/rs.3.rs-8298517/v1), 2026-01-16
Supplement: Supplementary file 1 [file 1237ecd7055188f85460e1e2.pdf]

| <b>No.</b> | <b>object</b>                                                                  | <b>Agree<br/>3</b> | <b>Neutral<br/>2</b> | <b>Disagree<br/>1</b> |
|------------|--------------------------------------------------------------------------------|--------------------|----------------------|-----------------------|
| <b>1</b>   | I liked this teaching method                                                   |                    |                      |                       |
| <b>2</b>   | My information needs were better met                                           |                    |                      |                       |
| <b>3</b>   | The knowledge and skills I gained through this method are useful in my career. |                    |                      |                       |
| <b>4</b>   | This way, I can get a better score                                             |                    |                      |                       |
| <b>5</b>   | Learning with this method happens in a shorter time                            |                    |                      |                       |
| <b>6</b>   | Learning is better this way                                                    |                    |                      |                       |
| <b>7</b>   | This method increases my motivation to learn                                   |                    |                      |                       |
| <b>8</b>   | This method increased my interest                                              |                    |                      |                       |
| <b>9</b>   | This method strengthened my clinical judgment                                  |                    |                      |                       |
| <b>10</b>  | I understood surface anatomy better                                            |                    |                      |                       |
| <b>11</b>  | This method increased my clinical skills                                       |                    |                      |                       |
| <b>12</b>  | This method strengthened my clinical skills                                    |                    |                      |                       |
| <b>13</b>  | This method increased my decision making power                                 |                    |                      |                       |
| <b>14</b>  | With this method I gained a holistic view of the patient                       |                    |                      |                       |
| <b>15</b>  | Overall, I am satisfied with this method                                       |                    |                      |                       |
| <b>16</b>  | I recommend implementing this method in other courses                          |                    |                      |                       |
